# Supplementary material
Source: Research Square preprint supplement (doi:10.21203/rs.3.rs-9852062/v1)
Supplement: Supplementary file 1 [file 4a986c325524e48e510a353a.docx]

| **Antibody** | **Catalog number** | **Company** | **Host** | **Dilution factor** |
| --- | --- | --- | --- | --- |
| Anti-Iba1 | Ab178846 | Abcam | Rabbit | 1:1000 |
| Anti-GFAP | ab4674 | Abcam | Chicken | 1:500 |
| MBP polyclonal | PA5-78397 | Invitrogen | Rabbit | 1:500 |
| PDGFR-α monoclonal | ab90967 | Abcam | Rat | 1:200 |
| Olig-2 polyclonal | PA5-85734 | Invitrogen | Rabbit | 1:1000 |
| Brevican Monoclonal | 75-281 | Invitrogen | Mouse | 1:100 |
| Versican Polyclonal | bs-2533R | Invitrogen | Rat | 1:200 |
| Caspase 3 Monoclonal | 66470-2-Ig | Proteintech | Mouse | 1:500 |
| NeuN Polyclonal | PA5-143567 | Invitrogen | Chicken | 1:5000 |

**Table 1**: List of primary antibodies used
